# Supplementary material for: Proteolysis targeting chimeric molecules as therapy for multiple myeloma: efficacy, biomarker and drug combinations
Source: PubMed Central journal article supplement — Haematologica. 2019 Jan 3;104(6):1209–20. doi: 10.3324/haematol.2018.201483 (PMC6545861; doi:10.3324/haematol.2018.201483), 2019-06
Supplement: 2018.201483_LIM_SUPPL.pdf [file 2018.201483_LIM_SUPPL.pdf]

## Proteolysis targeting chimeric molecules as therapy for multiple myeloma: efficacy, biomarker and drug combinations

Su Lin Lim,<sup>1\*</sup> Alisa Damnernsawad,<sup>2\*</sup> Pavithra Shyamsunder,<sup>3</sup> Wee Joo Chng,<sup>3</sup> Bing Chen Han,<sup>1</sup> Liang Xu,<sup>3</sup> Jian Pan,<sup>1</sup> Dakle Pushkar Pravin,<sup>3</sup> Serhan Alkan,<sup>1</sup> Jeffrey W. Tyner<sup>2\*\*</sup> H. Phillip Koeffler<sup>1,3\*\*</sup>

<sup>1</sup>Cedars Sinai Medical Center, Los Angeles, CA, USA; <sup>2</sup>Division of Hematology and Medical Oncology, Oregon Health and Science University Knight Cancer Institute, Portland, OR, USA and <sup>3</sup>Cancer Science Institute of Singapore, National University of Singapore, Singapore

*\*SLL and AD contributed equally to this work. \*\*JWT and HPK contributed equally to this work.*

©2019 Ferrata Storti Foundation. This is an open-access paper. doi:10.3324/haematol.2018.201483

Received: July 11, 2018.

Accepted: January 2, 2019.

Pre-published: January 3, 2019.

Correspondence: *SU LIN LIM* - [sulin\\_lim\\_86@hotmail.com](mailto:sulin_lim_86@hotmail.com)

---

## Supplemental data:

### Supplementary Figure 1

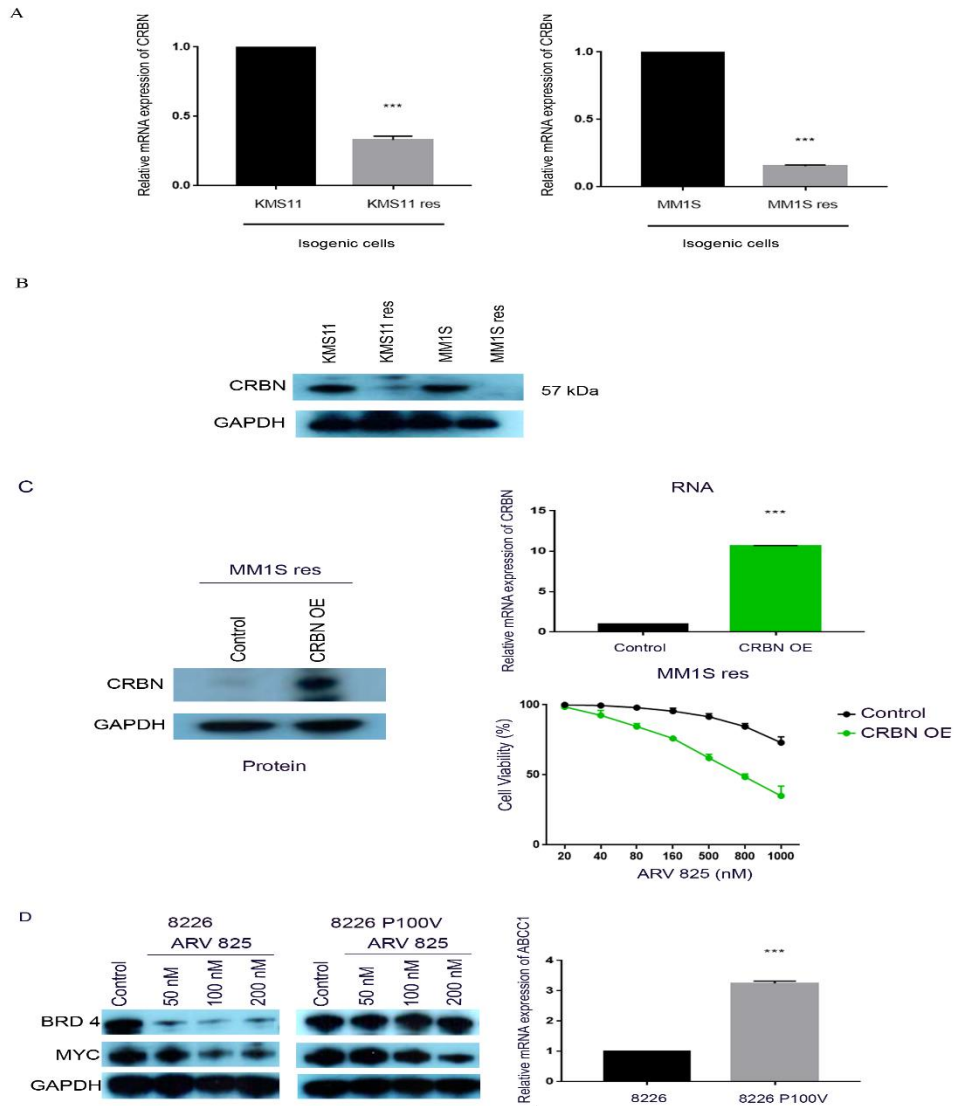

**Supplementary Figure 1.** (A) CRBN mRNA expression and (B) CRBN protein expression in parental (KMS11, MM1S) and isogenic lenalidomide resistant (KMS11 res and MM1S res) MM cells. (C) Levels of CRBN mRNA (right upper panel) and protein (left panel) present in MM1S res cells and their viability cultured with ARV 825 (1 nM to 1000 nM, 72 h) (right lower panel) after overexpression. OE: Overexpression. (D) Levels of BRD 4 and MYC protein expression (left panel) in 8226 and 8226 P100V, cultured with ARV 825 (50 nM, 100 nM, 200 nM, 4h). GAPDH, internal control.

Supplementary Figure 2

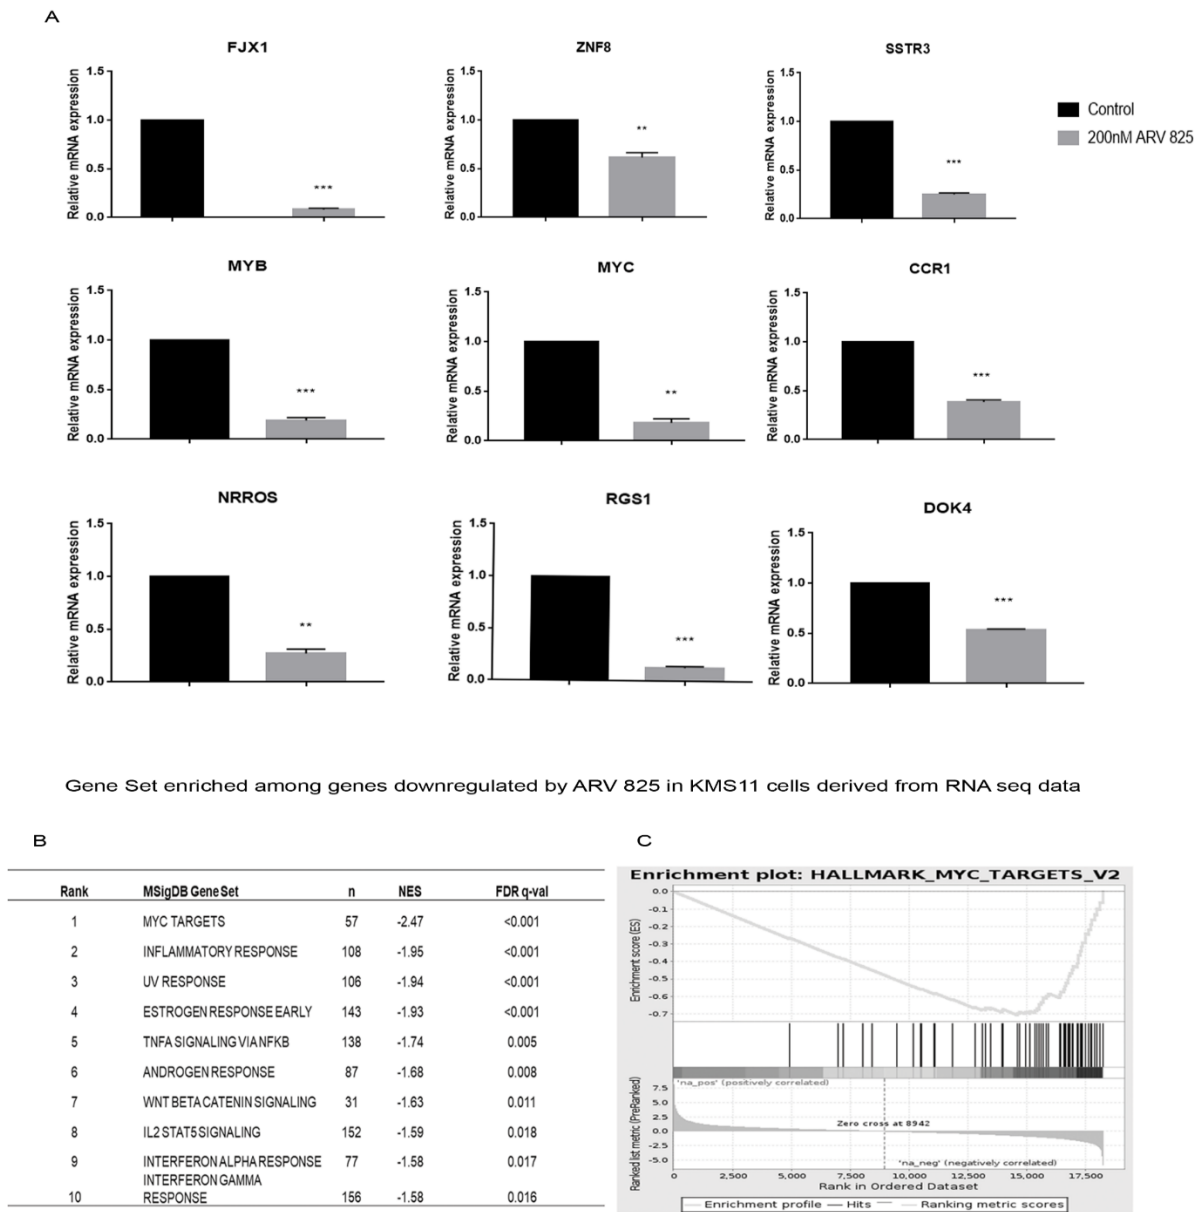

**Supplementary Figure 2.** (A) mRNA levels of 9 selected genes by qRT-PCR after ARV 825 treatment (200 nM ARV 825, 8 h) of KMS28BM cells. Expression of each gene was normalized to  $\beta$ -actin as a reference (control value converted to the value of 1). Data represent mean  $\pm$  SD of 3 independent experiments, each done in triplicate,  $*p \leq 0.001$ ,  $***p \leq 0.0001$ . (B) Table of gene sets enriched among genes downregulated by ARV 825 (20 nM, 8 h) in KMS11 MM cells derived from RNA seq data. Number of genes in each set (n), the normalized enrichment score (NES), and test of statistical significance (FDR q value). (C) GSEA of MYC-dependent gene sets.

Supplementary Figure 3

A

Ratio of IC50 of small molecule inhibitors with ARV 825 / without ARV 825  
<1= synergistic; =1 = additive; >1 = antagonistic

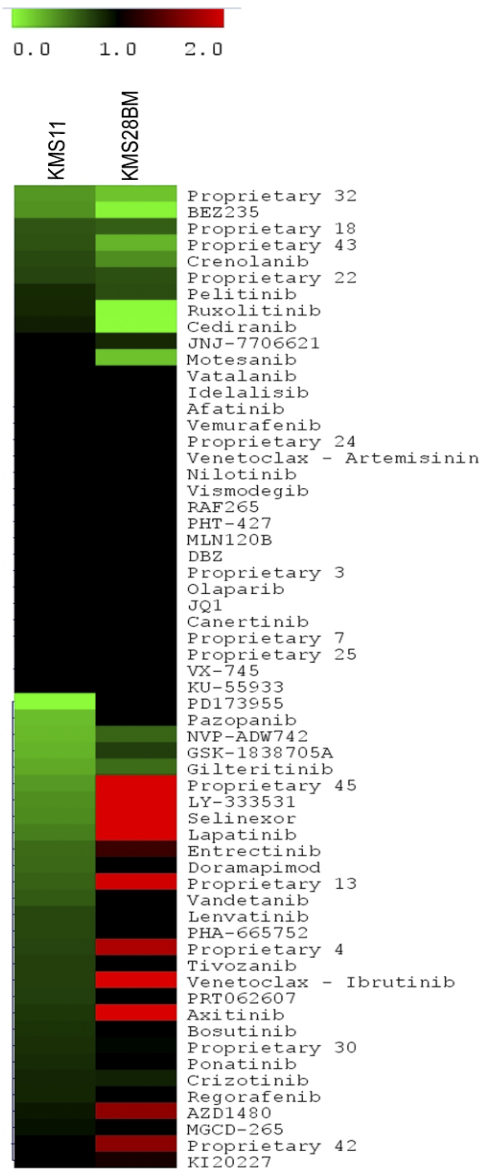

B

1 Combined effect of FLT3/AXL (Gilteritinib) with ARV 825

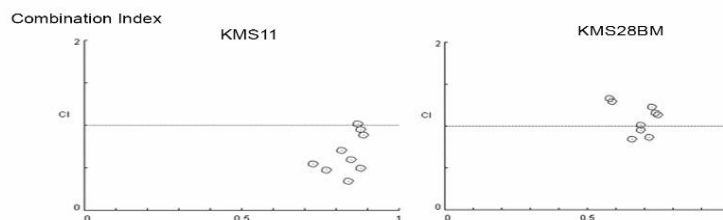

2 Combined effect of PKC $\beta$ 1 and 2 inhibitor (LY333531) with ARV 825

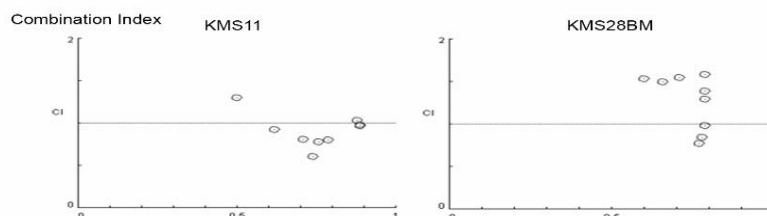

3 Combined effect of CBP/EP300 inhibitor (IGC003) with ARV 825

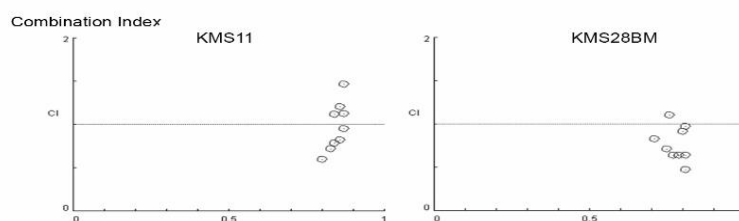

4 Combined effect of JAK inhibitor (Ruxolitinib) with ARV 825

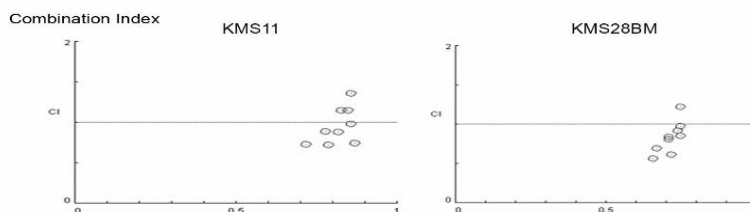

5 Combined effect of CRM1 inhibitor (Selinexor) with ARV 825

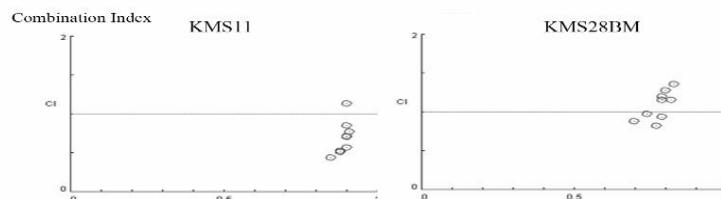

**Supplementary Figure 3.** High throughput screening of small molecule inhibitors. (A) KMS11 and KMS28BM MM cells: Heatmap of ratio (IC<sub>50</sub> of small molecule inhibitor with ARV 825 divide by IC<sub>50</sub> of small molecule inhibitor without ARV 825) using KMS11 and KMS28BM cells. Ratio < 1, =1 and > 1 indicates synergistic, additive and antagonistic activity, respectively. Shown are 60 out of the 170 small molecule inhibitors tested. (B 1-5) Combination Index plot of 5 small molecule inhibitors with synergistic activity with ARV 825 on either KMS11 or KMS28BM cells.

# Supplementary Figure 4

A

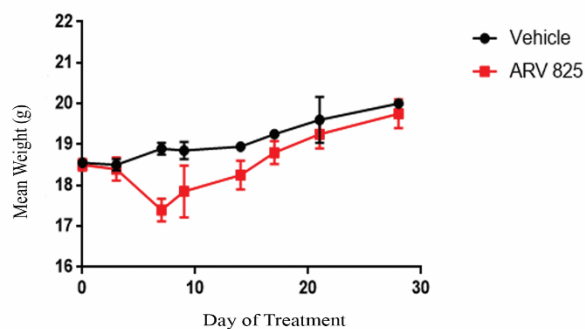

B

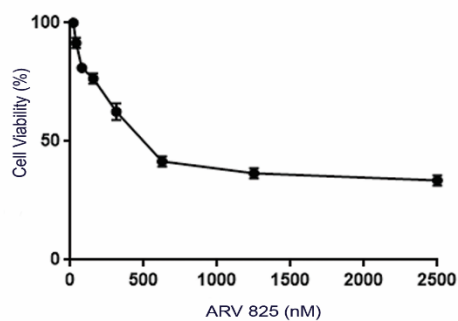

**Supplementary Figure 4.** (A) Comparison of weight of mice during and after treatment with either ARV 825 or diluent control. Mean  $\pm$  SD of 9 mice in each group. (B) Mouse bone marrow cells ( $2 \times 10^5$  cells/well) treated with PROTAC ARV 825 (1 nM-2500 nM, 72 h, and measured by MTT assay). IC<sub>50</sub> = 500 nM  $\pm$  2. Results represent the mean  $\pm$  SD of 3 experiments done in triplicate.

**Supplementary Table 1: List of inhibitors**

| <b>Inhibitor</b>                | <b>Manufacturer</b>           |
|---------------------------------|-------------------------------|
| Bortezomib                      | Selleckchem Catalog No S1013  |
| Cediranib                       | Selleckchem Catalog No S1017  |
| Crenolanib                      | Selleckchem Catalog No S2730  |
| Gilteritinib (ASP2215)          | Selleckchem Catalog No S7754  |
| GSK-1838705A                    | Selleckchem Catalog No S2703  |
| IGC001                          | Wuxi App Tech Co.             |
| Lapatinib                       | Selleckchem Catalog No S2111  |
| LY333531 (hydrochloride)        | Cayman Chemical Item No 13964 |
| LY3023414                       | Selleckchem Catalog No S8322  |
| Melphalan                       | Selleckchem Catalog No S8266  |
| Motesanib Diphosphate (AMG-706) | Selleckchem Catalog No S1032  |
| Pomalidomide                    | Selleckchem Catalog No S1567  |
| Ruxolitinib                     | Selleckchem Catalog No S1378  |
| Selinexor (KPT330)              | Selleckchem Catalog No S7252  |

**Supplementary Table 2: Sequences of qRT-PCR primers**

| <b>Gene</b>   | <b>Forward (5' → 3')</b> | <b>Reverse (5' → 3')</b> |
|---------------|--------------------------|--------------------------|
| <i>FJX1</i>   | TAGCAGGCATGTGGGACAAG     | AATGTGCTTGGCGAGGAAGT     |
| <i>ZNF8</i>   | TCTACCGTGACGTGATGCTG     | GTGGTTCCTCTCTCAGCCAC     |
| <i>SSTR3</i>  | TGTCCACGACCTCAGAACCT     | ATGACCAGCGAGTTACCCAG     |
| <i>KCNJ12</i> | CATCGTGTCATCGGAGGAGG     | GTCCACACAGGTGGTGAACA     |
| <i>CCR1</i>   | CACAGGCTTGTACAGCGAGA     | CTGCAGGTGTGGTGAGTGAA     |
| <i>MYB</i>    | GACCCTGAGAAGGAAAAGCGA    | CATGAGGTCTGGTGTGGTCG     |
| <i>NRROS</i>  | CGGGACCTGTACAACACCTC     | ATGTGAAGCGTCATCAGGCA     |
| <i>MYC</i>    | TAGTGGAAAACCAGCAGCCT     | AGAAATACGGCTGCACCGAG     |
| <i>RGS1</i>   | GAGTTCTGGCTGGCTTGTGA     | ATTCTCGAGTGCGGAAGTCA     |
| <i>DOK4</i>   | CTCTGGGACATCCACAACCC     | CCTTCCCCAGCATCACACAT     |
| <i>ABCB1</i>  | CCCATCATTGCAATAGCAGG     | TGTTCAAACCTTCTGCTCCTGA   |
| <i>ABCC1</i>  | ATGTCACGTGGAATACCAGC     | GAAGACTGAACTCCCTTCCT     |

**Supplementary Table 3: IC50s of ARV 825 against MM cells, 72 h**

| <b>Cell lines</b>                  | <b>ARV 825 IC50 <math>\pm</math> SD (nM), 72 h</b> |
|------------------------------------|----------------------------------------------------|
| KMS11                              | 9 $\pm$ 1.9                                        |
| MM1R (Steroid resistant)           | 10 $\pm$ 1.8                                       |
| KMS12BM                            | 11 $\pm$ 1.3                                       |
| MM1S                               | 11 $\pm$ 1.8                                       |
| H929                               | 16 $\pm$ 1.6                                       |
| KMS18                              | 17 $\pm$ 1.1                                       |
| 8226 LR 5 (Melphalan resistant)    | 20 $\pm$ 1.9                                       |
| KMS11 res (Lenalidomide resistant) | 70 $\pm$ 1.4                                       |
| U266                               | 71 $\pm$ 1.8                                       |
| 8226                               | 84 $\pm$ 1.4                                       |
| KMS28BM                            | 137 $\pm$ 1.1                                      |
| 8226 P100V (Bortezomib resistant)  | 500 $\pm$ 0.6                                      |
| MM1S res (Lenalidomide resistant)  | >500                                               |

**Supplementary Table 4: IC50s of MZ1 against MM cells, 72 h**

| Cell lines                         | MZ1 IC50 $\pm$ SD (nM), 72 h |
|------------------------------------|------------------------------|
| H929                               | 3 $\pm$ 1.2                  |
| MM1S res (Lenalidomide resistant)  | 7 $\pm$ 0.75                 |
| KMS11 res (Lenalidomide resistant) | 15 $\pm$ 1.6                 |
| MM1S                               | 18.3 $\pm$ 1.2               |
| MM1R (Steroid resistant)           | 37 $\pm$ 1.2                 |
| KMS12BM                            | 60 $\pm$ 0.8                 |
| KMS28BM                            | 69 $\pm$ 1.2                 |
| KMS11                              | 104 $\pm$ 1.2                |
| U266                               | 385 $\pm$ 1.4                |
| KMS18                              | 700 $\pm$ 1.2                |
| 8226 LR5 (Melfalan resistant)      | 2300 $\pm$ 1.4               |
| 8226                               | 2600 $\pm$ 1.4               |
| 8226 P100V (Bortezomib resistant)  | > 3000                       |

**Supplementary Table 5: Combination Index of ARV 825 synergistic with small molecule inhibitors (CI < 1, CI = 1 and CI > 1 represent synergism, additive, and antagonism respectively).**

| <b>KMS11</b>             |                     |           |           |
|--------------------------|---------------------|-----------|-----------|
|                          | <b>ARV 825 (nM)</b> |           |           |
|                          | <b>5</b>            | <b>10</b> | <b>20</b> |
| <b>Cediranib (nM)</b>    |                     |           |           |
| <b>200</b>               | 0.57                | 0.61      | 0.78      |
| <b>400</b>               | 0.46                | 0.50      | 0.73      |
| <b>800</b>               | 0.46                | 0.48      | 0.71      |
|                          |                     |           |           |
| <b>Crenolanib (nM)</b>   |                     |           |           |
| <b>500</b>               | 0.63                | 0.7       | 1.0       |
| <b>1000</b>              | 0.64                | 0.7       | 1.0       |
| <b>2000</b>              | 0.63                | 0.7       | 1.0       |
|                          |                     |           |           |
| <b>GSK 1904529A (nM)</b> |                     |           |           |
| <b>150</b>               | 0.73                | 0.74      | 0.84      |
| <b>300</b>               | 0.3                 | 0.57      | 0.77      |
| <b>600</b>               | 0.5                 | 0.46      | 0.71      |
|                          |                     |           |           |

|                          |      |      |      |
|--------------------------|------|------|------|
| <b>LY3023414 (nM)</b>    |      |      |      |
| <b>60</b>                | 0.55 | 0.62 | 0.85 |
| <b>120</b>               | 0.56 | 0.58 | 0.88 |
| <b>240</b>               | 0.63 | 0.76 | 1.02 |
|                          |      |      |      |
| <b>Motesanib (μM)</b>    |      |      |      |
| <b>10</b>                | 0.55 | 0.70 | 1.0  |
| <b>20</b>                | 0.48 | 0.60 | 0.95 |
| <b>40</b>                | 0.35 | 0.49 | 0.89 |
|                          |      |      |      |
| <b>Selinexor (nM)</b>    |      |      |      |
| <b>50</b>                | 0.44 | 0.52 | 0.71 |
| <b>100</b>               | 0.51 | 0.57 | 0.85 |
| <b>200</b>               | 0.71 | 0.77 | 1.1  |
|                          |      |      |      |
| <b>Gilteritinib (nM)</b> |      |      |      |
| <b>300</b>               | 0.77 | 0.85 | 1.1  |
| <b>600</b>               | 0.55 | 0.66 | 1.0  |
| <b>1200</b>              | 0.85 | 0.58 | 0.82 |
|                          |      |      |      |
| <b>LY333531 (μM)</b>     |      |      |      |
| <b>1</b>                 | 1.3  | 0.93 | 0.6  |
| <b>3</b>                 | 0.81 | 0.78 | 0.8  |

|                         |      |      |     |
|-------------------------|------|------|-----|
| <b>6</b>                | 0.97 | 0.98 | 1.0 |
|                         |      |      |     |
| <b>IGC003 (μM)</b>      |      |      |     |
| <b>1</b>                | 0.6  | 0.72 | 1.1 |
| <b>3</b>                | 0.78 | 0.82 | 1.2 |
| <b>6</b>                | 0.95 | 1.1  | 1.5 |
|                         |      |      |     |
| <b>Ruxolitinib (μM)</b> |      |      |     |
| <b>5</b>                | 0.65 | 0.74 | 1.1 |
| <b>10</b>               | 0.65 | 0.8  | 1.1 |
| <b>20</b>               | 0.72 | 0.92 | 1.4 |
|                         |      |      |     |

| <b>KMS28BM</b>         |                     |            |            |
|------------------------|---------------------|------------|------------|
|                        | <b>ARV 825 (nM)</b> |            |            |
|                        | <b>50</b>           | <b>100</b> | <b>200</b> |
| <b>Cediranib (μM)</b>  |                     |            |            |
| <b>3</b>               | 0.69                | 0.62       | 0.8        |
| <b>6</b>               | 0.63                | 0.62       | 0.78       |
| <b>12</b>              | 0.45                | 0.48       | 0.71       |
|                        |                     |            |            |
| <b>Crenolanib (nM)</b> |                     |            |            |
| <b>500</b>             | 0.6                 | 0.56       | 0.79       |

|                         |      |      |      |
|-------------------------|------|------|------|
| <b>1000</b>             | 0.45 | 0.48 | 0.70 |
| <b>2000</b>             | 0.59 | 0.6  | 0.81 |
|                         |      |      |      |
| <b>GSK1904529A (nM)</b> |      |      |      |
| <b>150</b>              | 0.38 | 0.20 | 0.72 |
| <b>300</b>              | 0.51 | 0.45 | 0.45 |
| <b>600</b>              | 0.29 | 0.29 | 0.51 |
|                         |      |      |      |
| <b>LY3023414 (nM)</b>   |      |      |      |
| <b>120</b>              | 0.68 | 0.66 | 0.88 |
| <b>240</b>              | 0.64 | 0.43 | 0.74 |
| <b>480</b>              | 0.75 | 0.82 | 0.96 |
|                         |      |      |      |
| <b>Motesanib (μM)</b>   |      |      |      |
| <b>10</b>               | 0.46 | 0.54 | 0.51 |
| <b>20</b>               | 0.42 | 0.35 | 0.41 |
| <b>40</b>               | 0.24 | 0.22 | 0.27 |
|                         |      |      |      |
| <b>Selinexor (nM)</b>   |      |      |      |
| <b>100</b>              | 0.88 | 0.82 | 1.15 |
| <b>200</b>              | 0.98 | 0.94 | 1.28 |
| <b>400</b>              | 1.2  | 1.15 | 1.36 |
|                         |      |      |      |

|                          |      |      |      |
|--------------------------|------|------|------|
| <b>Gilteritinib (nM)</b> |      |      |      |
| <b>300</b>               | 0.87 | 0.76 | 1.00 |
| <b>600</b>               | 0.6  | 0.54 | 0.76 |
| <b>1200</b>              | 0.59 | 0.58 | 0.75 |
|                          |      |      |      |
| <b>LY333531 (μM)</b>     |      |      |      |
| <b>2.5</b>               | 1.5  | 1.5  | 1.55 |
| <b>5</b>                 | 0.77 | 0.84 | 0.98 |
| <b>10</b>                | 1.29 | 1.39 | 1.58 |
|                          |      |      |      |
| <b>IGC003 (μM)</b>       |      |      |      |
| <b>1</b>                 | 0.83 | 0.72 | 1.1  |
| <b>3</b>                 | 0.64 | 0.64 | 0.91 |
| <b>6</b>                 | 0.48 | 0.64 | 0.97 |
|                          |      |      |      |
| <b>Ruxolitinib (μM)</b>  |      |      |      |
| <b>5</b>                 | 0.56 | 0.62 | 0.85 |
| <b>10</b>                | 0.69 | 0.81 | 0.97 |
| <b>20</b>                | 0.83 | 0.91 | 1.22 |

| <b>8226</b>             |                     |           |            |
|-------------------------|---------------------|-----------|------------|
|                         | <b>ARV 825 (nM)</b> |           |            |
|                         | <b>40</b>           | <b>80</b> | <b>160</b> |
| <b>Cediranib (μM)</b>   |                     |           |            |
| <b>1.5</b>              | 0.49                | 0.63      | 0.7        |
| <b>3</b>                | 0.63                | 0.74      | 0.81       |
| <b>6</b>                | 0.89                | 0.91      | 0.91       |
|                         |                     |           |            |
| <b>Crenolanib (nM)</b>  |                     |           |            |
| <b>1000</b>             | 0.74                | 0.8       | 0.82       |
| <b>2000</b>             | 0.88                | 0.9       | 0.89       |
| <b>4000</b>             | 0.91                | 0.91      | 0.91       |
|                         |                     |           |            |
| <b>GSK1904529A (nM)</b> |                     |           |            |
| <b>5000</b>             | 0.46                | 0.55      | 0.89       |
| <b>10000</b>            | 0.57                | 0.69      | 0.98       |
| <b>20000</b>            | 0.85                | 0.96      | 1.21       |
|                         |                     |           |            |
| <b>LY3023414 (nM)</b>   |                     |           |            |
| <b>20</b>               | 0.23                | 0.44      | 0.48       |
| <b>40</b>               | 0.46                | 0.59      | 0.62       |
| <b>80</b>               | 0.66                | 0.71      | 0.73       |
|                         |                     |           |            |

| <b>Motesanib (μM)</b> |      |      |      |
|-----------------------|------|------|------|
| <b>10</b>             | NA   | NA   | 0.57 |
| <b>20</b>             | NA   | NA   | 0.46 |
| <b>40</b>             | 0.15 | 0.28 | 0.42 |

**Supplementary Table 6: Combination Index of MZ1 synergistic with small molecule inhibitors (CI < 1, CI = 1 and CI > 1 represent synergism, additive, and antagonism respectively).**

| <b>KMS11</b>            |                 |            |            |
|-------------------------|-----------------|------------|------------|
|                         | <b>MZ1 (nM)</b> |            |            |
|                         | <b>50</b>       | <b>100</b> | <b>200</b> |
| <b>Cediranib (nM)</b>   |                 |            |            |
| <b>200</b>              | 0.44            | 0.55       | 0.71       |
| <b>400</b>              | 0.39            | 0.50       | 0.66       |
| <b>800</b>              | 0.37            | 0.47       | 0.68       |
|                         |                 |            |            |
| <b>Crenolanib (nM)</b>  |                 |            |            |
| <b>500</b>              | 0.99            | 0.87       | 0.91       |
| <b>1000</b>             | 0.92            | 0.87       | 0.82       |
| <b>2000</b>             | 0.98            | 1.05       | 0.93       |
|                         |                 |            |            |
| <b>GSK1904529A (nM)</b> |                 |            |            |
| <b>150</b>              | 0.67            | 0.68       | 0.86       |
| <b>300</b>              | 0.55            | 0.60       | 0.75       |
| <b>600</b>              | 0.53            | 0.54       | 0.69       |
|                         |                 |            |            |
| <b>LY3023414 (nM)</b>   |                 |            |            |
| <b>60</b>               | 0.86            | 0.85       | 0.88       |

|                       |      |      |      |
|-----------------------|------|------|------|
| <b>120</b>            | 0.90 | 0.76 | 0.86 |
| <b>240</b>            | 0.86 | 0.71 | 0.89 |
|                       |      |      |      |
| <b>Motesanib (μM)</b> |      |      |      |
| <b>10</b>             | 0.64 | 0.57 | 0.77 |
| <b>20</b>             | 0.42 | 0.42 | 0.67 |
| <b>40</b>             | 0.23 | 0.32 | 0.56 |

| <b>KMS28BM</b>          |                 |           |            |
|-------------------------|-----------------|-----------|------------|
|                         | <b>MZ1 (nM)</b> |           |            |
|                         | <b>35</b>       | <b>70</b> | <b>140</b> |
| <b>Cediranib (nM)</b>   |                 |           |            |
| <b>3000</b>             | 0.64            | 0.59      | 0.78       |
| <b>6000</b>             | 0.69            | 0.85      | 0.97       |
| <b>12000</b>            | 0.68            | 1.22      | 0.91       |
|                         |                 |           |            |
| <b>Crenolanib (nM)</b>  |                 |           |            |
| <b>500</b>              | 1.64            | 0.85      | 0.96       |
| <b>1000</b>             | 1.31            | 0.75      | 0.99       |
| <b>2000</b>             | 0.94            | 0.99      | 1.31       |
|                         |                 |           |            |
| <b>GSK1904529A (nM)</b> |                 |           |            |
| <b>300</b>              | 0.88            | 0.73      | 0.78       |

|                       |      |      |      |
|-----------------------|------|------|------|
| <b>600</b>            | 0.60 | 0.56 | 0.67 |
| <b>1200</b>           | 0.42 | 0.44 | 0.58 |
|                       |      |      |      |
| <b>LY3023414 (nM)</b> |      |      |      |
| <b>120</b>            | 1.05 | 1.25 | 1.10 |
| <b>240</b>            | 1.11 | 1.02 | 1.10 |
| <b>480</b>            | 1.14 | 1.22 | 1.07 |
|                       |      |      |      |
| <b>Motesanib (μM)</b> |      |      |      |
| <b>10</b>             | 0.81 | 0.80 | 0.94 |
| <b>20</b>             | 1.05 | 0.72 | 0.95 |
| <b>40</b>             | 0.79 | 0.70 | 0.93 |

## **Online Supplemental Method:**

### **Cell culture**

Human MM cell lines: KMS11, KMS28BM, KMS18, KMS12BM, MM1S, MM1R, H929, 8226, 8226 LR5, 8226 P100V and U266 were kind gift from Dr. W.J. Chng (Cancer Science Institute, Singapore) and KMS11 res and MM1S res were generous gift from Dr. A.K. Stewart (Mayo Clinic, Arizona).

### **Cell proliferation assay**

Twenty thousand cells were seeded in 96-well plates followed by drug treatment. After culture, 10  $\mu$ l of MTT (2-(4,5-dimethylthiazol-2-yl)-2,5-diphenyltetrazolium bromide) was added to the wells and cultured at 37°C for an additional 4 h followed by addition of 100  $\mu$ l stop solution (10% Sodium Dodecyl Sulphate). Plates were measured with a spectrophotometer at 570 nm absorbance. IC50 values were calculated using Graph pad Prism.

### **Soft agar colony formation**

Soft agar colony assay was performed to evaluate the anchorage-independent growth of MM cells. 500  $\mu$ l of 0.5% agarose (dissolved in RPMI with 10% FBS) was added to 12-well plates as a bottom layer. 1,000 cells/well were seeded in 500  $\mu$ l of top layer (0.35% agarose in RPMI with 10% FBS) either with or without drug for 21 days. Plates were kept at 37 °C in a 5% CO<sub>2</sub> incubator before analysis. The colonies were examined and counted using an inverted light microscope.

### **Annexin V and propidium iodide (Annexin V-PI) apoptosis analysis**

Cells were treated with different concentrations of ARV 825 for 48 h. Staining was performed using Apoptosis Detection Kit II (BD Biosciences, USA). Cells were harvested and washed twice with phosphate-buffered saline (PBS, Life technologies, USA), suspended in 1X binding buffer with 5 µl of FITC conjugated Annexin V and 5 µl of PI for 15 min in the dark at room temperature. Samples were analyzed using flow cytometric analysis (Sony SA3800).

### **Cell cycle analysis**

Cells were treated with different concentrations of ARV 825 (48 h), fixed with 70% chilled ethanol, washed with PBS two times and stained with PI solution [40 µg/ml PI, Triton X-100 (1%), 20 µg/ml DNase-free RNase A in PBS] for 30 min at 37 °C in the dark followed by flow cytometric analysis (Sony SA3800). Cells which were Annexin and PI positive were defined as apoptotic cells.

### **Screening of small molecule inhibitors**

Inhibitors were provided by or purchased from several manufacturers (Supplementary Table 1). Graded concentrations of small molecule inhibitors were applied to 384-well plates containing 5,000 cells per well and incubated for 3 days at 37°C, 5% CO<sub>2</sub>. Relative number of viable cells were assayed with tetrazolium-based cell viability assay and were normalized to cells containing no-drug control. A third order polynomial curve fit was used to calculate IC<sub>50</sub> values for each drug.

## **Drug combination studies**

Results from MTT assays with different combinations of drugs were evaluated by CompuSyn (ComboSyn, Inc, Paramus, NJ). A combination index (CI) plot is a Fa-CI plot in which  $CI < 1$ ,  $= 1$ ,  $> 1$  indicate synergism, additive and antagonism, respectively. Fa: fraction of proliferation inhibition by the drug.

## **Reagent and antibodies**

ARV 825 was developed by the C.M. Crew's laboratory (Department of Chemistry, Yale University, New Haven, CT, USA). We obtained the drug from Chemietek (Indianapolis, IN, USA). For *in vitro* administration, ARV 825 was dissolved in dimethyl sulfoxide (Sigma-Aldrich) (20 mM) and stored at  $-20^{\circ}\text{C}$ . Antibody against CRBN (cat no. HPA045910) was purchased from Sigma-Aldrich. Antibodies against BRD 2, BRD 4 (cat no. 5848S, 13440S) were purchased from Cell Signaling Technology (Danvers, MA, USA). Antibody against BRD 3 (cat no. 11859-1-AP) was purchased from Proteintech (Chicago, USA). Antibody against GAPDH (cat no. 2118) was from Cell Signaling Technology (Danvers, MA, USA). List of inhibitors are showed in Supplementary Table 1.

## **Western blot analysis**

Cell lysates were prepared using M-PER mammalian protein extraction reagent (Thermo Scientific, Rockford, USA) containing 1X protease cocktail inhibitor (Roche, Switzerland). After 20 min incubation on ice, lysates were centrifuged at 13,000g for 20 min at  $4^{\circ}\text{C}$ . Total protein concentrations was measured by Pierce Coomassie Plus (Bradford) assay kit (Thermo Fisher Scientific). Twenty micrograms of protein were loaded on SDS-PAGE gel and resolved at 80

voltages, followed by transfer to PVDF (Millipore, Massachusetts). Membranes were blocked with 5% non-fat milk and incubated with antibodies.

### **RNA sequencing and quantitative PCR of KMS11 cells**

mRNA expression profiling was done on biological duplicates (KMS11 control versus drug treated). After treatment with 20nM ARV 825 for 8 h, total RNA was extracted using RNeasy Isolation Kit (Qiagen, Germany). Sequencing libraries were prepared using TruSeq RNA Library Prep Kit (Illumina, San Diego) according to the manufacturer's protocol and were sequenced on HiSeq 2000 sequencer (Illumina). Paired-end reads (100 bp) were aligned to hg19 reference genome with Ensembl gtf (version 75) provided as a known junction file, using splice-aware STAR aligner. Expression levels were measured as FPKM using Stringtie software against Ensembl v75gtf. qRT-PCR was performed with standard procedures. cDNA was generated using Maxima H Minus First Strand cDNA synthesis kit (Thermo Scientific), and qRT-PCR was performed on CFX96 qPCR System (Bio-Rad). Expression of each gene was normalized to GAPDH and quantified using  $2^{-\Delta(Ct)}$  method. Primers for qRT-PCR are listed in Supplementary Table 2.
