# Supplementary material for: Proteolysis targeting chimeric molecules as therapy for multiple myeloma: efficacy, biomarker and drug combinations
Source: PubMed Central journal article supplement — Haematologica. 2019 Jan 3;104(6):1209–20. doi: 10.3324/haematol.2018.201483 (PMC6545861; doi:10.3324/haematol.2018.201483), 2019-06
Supplement: 2018_201483-Disclosures_and_Contributions.pdf [file 2018_201483-Disclosures_and_Contributions.pdf]

Haematologica  
HAEMATOL/2018/201483  
Version 4

Proteolysis targeting chimeric molecules as therapy for multiple  
myeloma: efficacy, biomarker and drug combinations

Su Lin Lim, Alisa Damnernasawad, Pavithra Shyamsunder, Wee Joo  
Chng, Bing Chen Han, Liang Xu, Jian Pan, Dakle Pushkar Pravin,  
Serhan Alkan, Jeffrey W. Tyner, and H. Phillip Koeffler

Disclosures: We thank Aaron Eschman and Melmed family for their invaluable support for this myeloma project. We also express gratitude to Morgan Stanley Inc. This work was also supported by a grant from the Leukemia and Lymphoma Society.

Contributions: SLL, AD, PS and BCH performed research, LX, JP and DPP performed data analysis, SLL and PK wrote the manuscript, WJC, PK, JWT and SA supervised the study.
